# Supplementary material for: Porous reduced graphene oxide (rGO)/WO3 nanocomposites for the enhanced detection of NH3 at room temperature
Source: Royal Society of Chemistry journal article supplement (doi:10.1039/c9na00048h), 2019-01-01
Supplement: c9na00048h1.pdf [file c9na00048h1.pdf]

### Supplementary Information (SI)

## Porous Reduced Graphene Oxide (rGO)/WO<sub>3</sub> Nanocomposites for the Enhanced Detection of NH<sub>3</sub> at Room Temperature

G. Jeevitha<sup>a</sup>, R. Abhinayaa<sup>a</sup>, D. Mangalaraj<sup>a\*</sup>, N. Ponpandian<sup>a</sup>, P. Meena<sup>b</sup>, Veena Mounasamy<sup>c</sup> and Sridharan Madanagurusamy<sup>c</sup>

<sup>a</sup> Department of Nanoscience and Technology, Bharathiar University, Coimbatore 641 046, India.

<sup>b</sup> Department of Physics, PSGR Krishnammal College for Women, Coimbatore 641 004, India

<sup>c</sup> Functional Nanomaterials & Devices Laboratory, Centre for Nanotechnology & Advanced Biomaterials and School of Electrical & Electronics Engineering, Shanmugha Arts, Science, Technology and Research Academy (SASTRA), Thanjavur - 613 401, India

\*Corresponding author. E-mail address: dmraj800@yahoo.com (D. Mangalaraj)

### ST:1 Existing literature for WO<sub>3</sub> nanostructures towards NH<sub>3</sub> sensing

| Material                                                   | Preparation method         | Morphology    | Concentration  | Response                                                | Working Temperature | Ref |
|------------------------------------------------------------|----------------------------|---------------|----------------|---------------------------------------------------------|---------------------|-----|
| Pure WO <sub>3</sub> , Au, Pt and Pd-doped WO <sub>3</sub> | Sol-gel process            | ---           | 400 - 4000 ppm | WO <sub>3</sub> = 1.3 and Pt-doped WO <sub>3</sub> = 12 | 250 - 450 °C        | [1] |
| Pure WO <sub>3</sub> , Pt-doped WO <sub>3</sub>            | Acidic precipitation route | Nanoparticles | 100 - 4000 ppm | WO <sub>3</sub> = 9 and Pt-doped WO <sub>3</sub> = 125  | 350 °C              | [2] |
| Pure WO <sub>3</sub> and Pt-                               | Nanocasting method         | Mesoporous    | 50 - 1500 ppm  | WO <sub>3</sub> = 6.72 Pt-loaded                        | 125 - 200 °C        | [3] |

|                                                        |                                   |               |              |                                                            |                  |      |
|--------------------------------------------------------|-----------------------------------|---------------|--------------|------------------------------------------------------------|------------------|------|
| loaded<br>WO <sub>3</sub>                              |                                   |               |              | WO <sub>3</sub> = 13.6                                     |                  |      |
| Chromium-doped WO <sub>3</sub>                         | Reflux condensation process       | Nanoparticles | 500 ppm      | WO <sub>3</sub> :Cr = ~ 82                                 | 700 °C           | [4]  |
| WO <sub>3</sub>                                        | Thermal oxidation process         | Nanowire      | 1500 ppm     | WO <sub>3</sub> = 9.7                                      | 250 °C           | [5]  |
| Pure WO <sub>3</sub> , Cr and Pt-doped WO <sub>3</sub> | Self-assembly and Sol-gel process | Macroporous   | 6.2-74 ppm   | WO <sub>3</sub> = 3.3<br>Pt-doped<br>WO <sub>3</sub> = 110 | 225 °C           | [6]  |
| WO <sub>3</sub>                                        | Acid precipitation method         | Nanorods      | 50 - 200 ppm | 96%                                                        | 400 °C           | [7]  |
| W <sub>18</sub> O <sub>49</sub>                        | Solvothermal technique            | Nanowires     | 0.1-10 ppm   | ---                                                        | Room temperature | [8]  |
| Polypyrrole-WO <sub>3</sub>                            | Electrospinning                   | Nanofibers    | 1-20 ppm     | 27%                                                        | 100 °C           | [9]  |
| WO <sub>3</sub>                                        | Electrospinning                   | Nanofibers    | 50-500 ppm   | ---                                                        | 350 °C           | [10] |
| WO <sub>3</sub> and Cr-WO <sub>3</sub>                 | Sol-gel process                   | -----         | 50 - 500 ppm | ---                                                        | 250 °C           | [11] |
| WO <sub>3</sub>                                        | Hydrothermal synthesis            | Nanorods      | 25-250 ppm   | 192                                                        | 50 °C            | [12] |

## 2.1. Synthesis of WO<sub>3</sub> nanostructures

The chemicals purchased from Sigma Aldrich and Hi-media are of analytical grade, and used without further purification. The facile solvothermal method was used to synthesize the different morphologies; WO<sub>3</sub> Aggregated nanoparticle (WO<sub>3</sub>-1), WO<sub>3</sub> nanospheres (WO<sub>3</sub>-2) and WO<sub>3</sub> nanorods (WO<sub>3</sub>-3) nanostructures were obtained on changing the surfactant. A typical synthesis process was as follows: Initially 0.1 M of

WCl<sub>6</sub> was dissolved in 30 mL of ethanol and 0.05 M of sodium dodecyl sulfate (SDS) was dissolved in 30 mL ethanol. Both the solutions were stirred separately for 1 hour. The SDS solution was then added dropwise into the WCl<sub>6</sub> solution, which was dark blue in colour. The mixture was stirred for another hour at room temperature, and then shifted into a teflon-lined stainless-steel autoclave and kept at 180 °C for 12 h. The resultant product was washed with double distilled water and ethanol to remove the unreacted ions by centrifugation before drying at 65 °C for 24 h. The final product obtained, WO<sub>3</sub>.H<sub>2</sub>O was calcined at 450 °C for 3 h to remove water molecules and to achieve pristine WO<sub>3</sub>, named as WO<sub>3</sub>-1. For the preparation of WO<sub>3</sub>-2 and WO<sub>3</sub>-3, the surfactant was changed to hexamethylenetetramine (HMTA) and cetyltrimethyl ammonium bromide (CTAB) respectively. The detailed parameters for the synthesis of WO<sub>3</sub> nanostructures are summarized in ST2 and the scheme for the preparation of WO<sub>3</sub> is given in Fig. S1.

**ST2: Synthesis parameters for the preparation of WO<sub>3</sub> nanostructures.**

| Samples            | Tungsten source  | Solvent used | pH  | Surfactant used | Temperature and time | Annealing temperature | Morphology               |
|--------------------|------------------|--------------|-----|-----------------|----------------------|-----------------------|--------------------------|
| WO <sub>3</sub> -1 | WCl <sub>6</sub> | Ethanol      | 0.5 | SDS             | 180 °C, 12 h         | 450 °C, 3 h           | Aggregated nanoparticles |
| WO <sub>3</sub> -2 | WCl <sub>6</sub> | Ethanol      | 0.5 | HMTA            | 180 °C, 12 h         | 450 °C, 3 h           | Nanospheres              |
| WO <sub>3</sub> -3 | WCl <sub>6</sub> | Ethanol      | 0.5 | CTAB            | 180 °C, 12 h         | 450 °C, 3 h           | Nanorods                 |

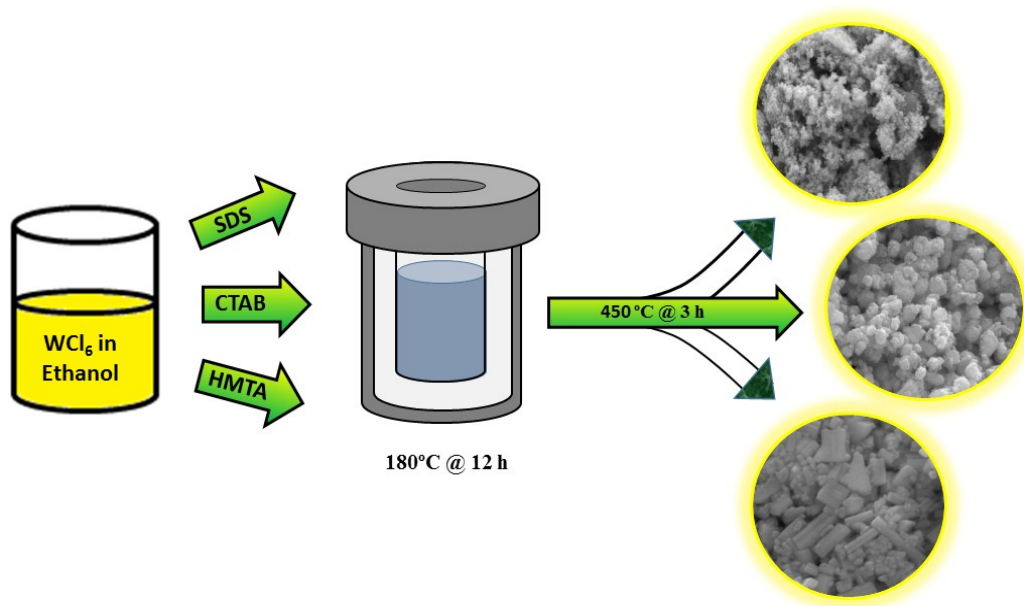

Fig. S1 Schematic diagram for the preparation of  $\text{WO}_3$  nanostructures with three different surfactants.

## XRD

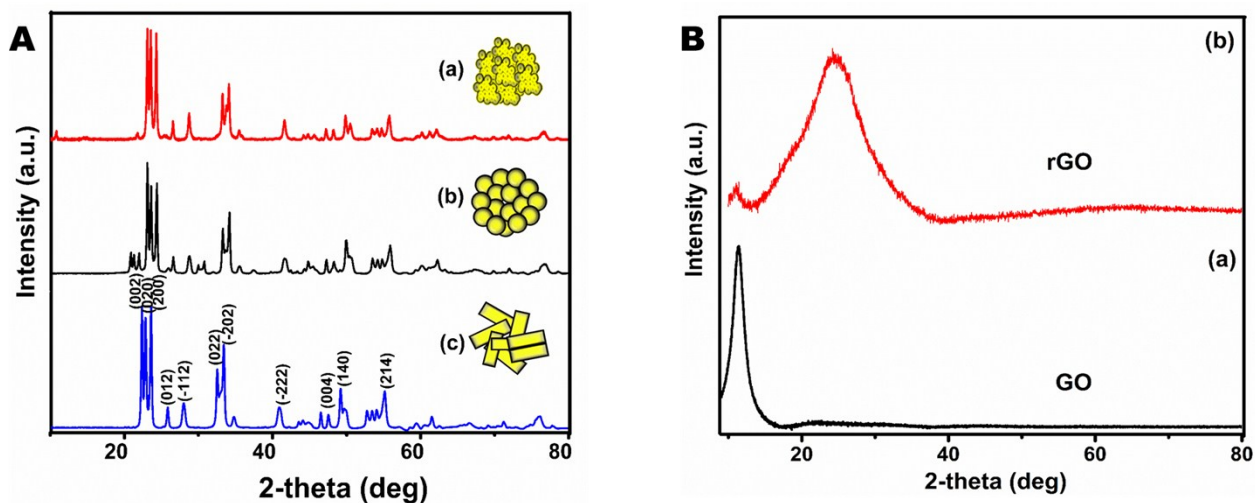

Fig. S2 Powder XRD spectrum of different morphologies of  $\text{WO}_3$  nanostructures obtained by solvothermal method using different surfactants (a)  $\text{WO}_3$ -1 (b)  $\text{WO}_3$ -2 and (c)  $\text{WO}_3$ -3

## RAMAN

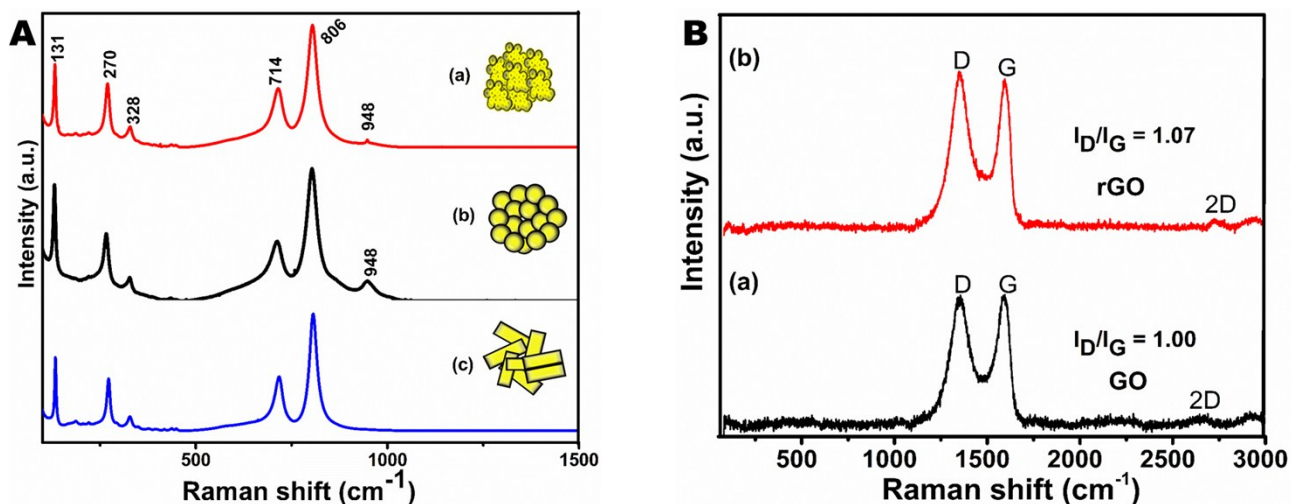

Fig. S3 Raman Spectrum of  $\text{WO}_3$  nanostructures for different morphologies (a)  $\text{WO}_3$ -1 (b)  $\text{WO}_3$ -2 (c)  $\text{WO}_3$ -3

For all the  $\text{WO}_3$  crystalline phases, three main frequency regions are observed; the first in the low frequency region ( $<200 \text{ cm}^{-1}$ ), where several peaks associated with the lattice modes appear; the second at intermediate frequencies ( $200\text{--}400 \text{ cm}^{-1}$ ) showing O–W–O bending mode, and the third at higher frequencies ( $600\text{--}900 \text{ cm}^{-1}$ ) with the peaks associated with W–O stretching modes. Sharp peaks appear at 132, 272, 328, 714 and 806  $\text{cm}^{-1}$  and these peaks confirm the  $\text{WO}_3$  formation with a monoclinic structure [13]. From the Raman spectra, it is clear that all the samples have the same monoclinic phase of  $\text{WO}_3$  irrespective of the different morphologies.

## FESEM:

Three different morphologies of  $\text{WO}_3$  have been prepared using the three surfactants SDS, HMTA and CTAB, where SDS is an anionic surfactant, CTAB is cationic and HMTA cationic. When the SDS is introduced into the prepared precursor solution, SDS molecules get adsorbed on the surface of  $\text{WCl}_6$  as tiny particles. These tiny particles mold into different shapes of  $\text{WO}_3$  nuclei, which grow into the nanoparticles when subjected to hydrothermal treatment. Fig. S4 (a and b) shows the observed FESEM images for the SDS assisted sample, which has a cloud like morphology. This sample exhibits a particle size distribution of 125-130 nm. Fig. S4 (c and d) shows the FESEM images for the HMTA assisted sample. Well-defined nanospheres

are observed, with diameters in the range of 110-120 nm. From Fig. S4 (e and f), it is evident that the presence of CTAB is favorable for the formation of  $WO_3$  nanorods. In general, CTAB is a cationic surfactant, which could pave the way for self-assembly and the formation  $WO_3$  1D nanorods and the average particle size is found to be between 110 - 120 nm [14-16].

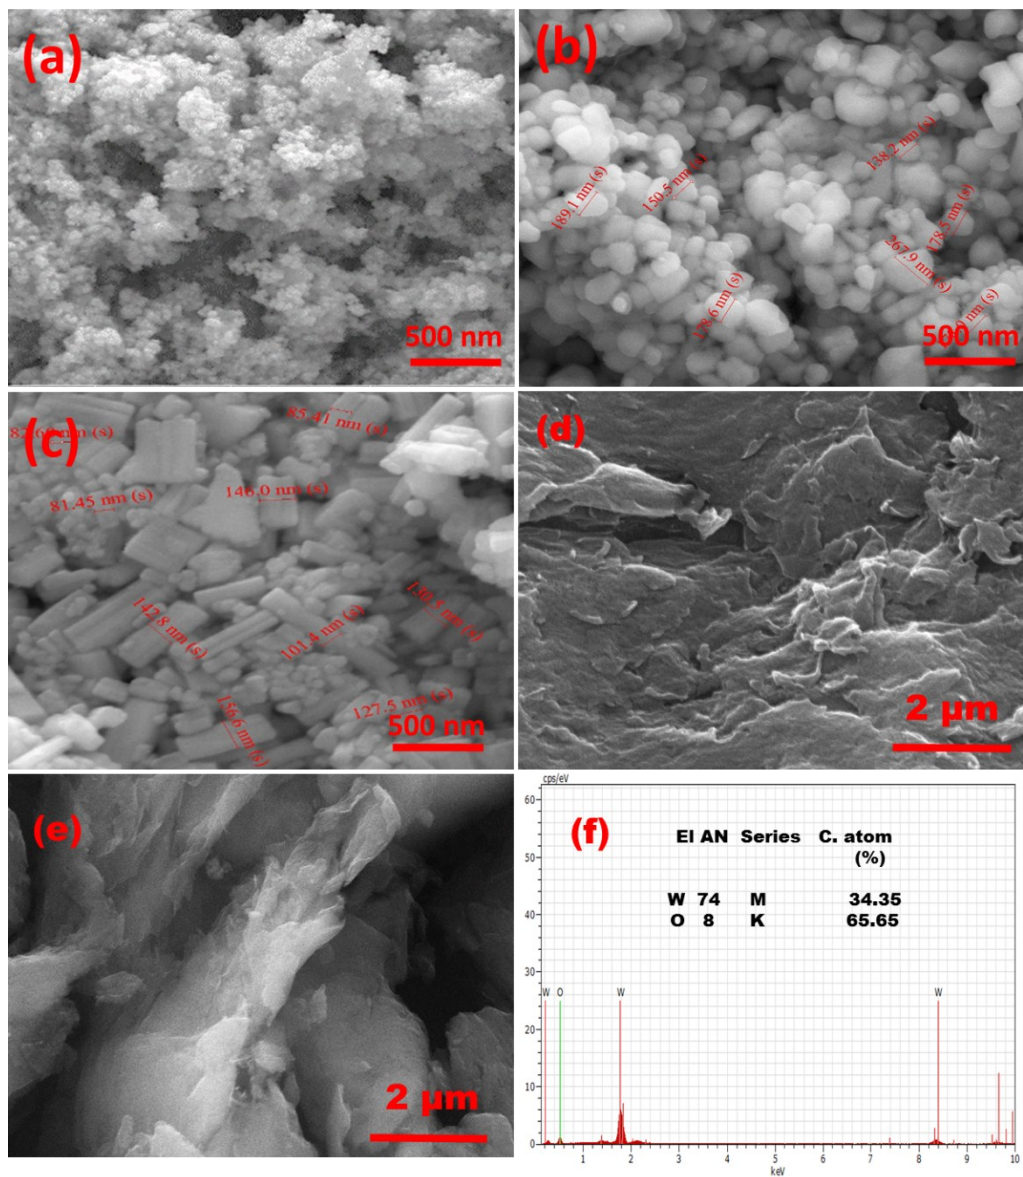

Fig. S4 FESEM image of  $WO_3$  synthesized using different surfactants and their morphologies (a)  $WO_3$ -1 aggregated nanoparticles (SDS as surfactant) (b)  $WO_3$ -2 nanospheres (HMTA as surfactant) (c)  $WO_3$ -3 nanorods (CTAB as surfactant) (d) graphene oxide sheet (e) Reduced Graphene Oxide and (f) EDAX spectrum of rGO/ $WO_3$

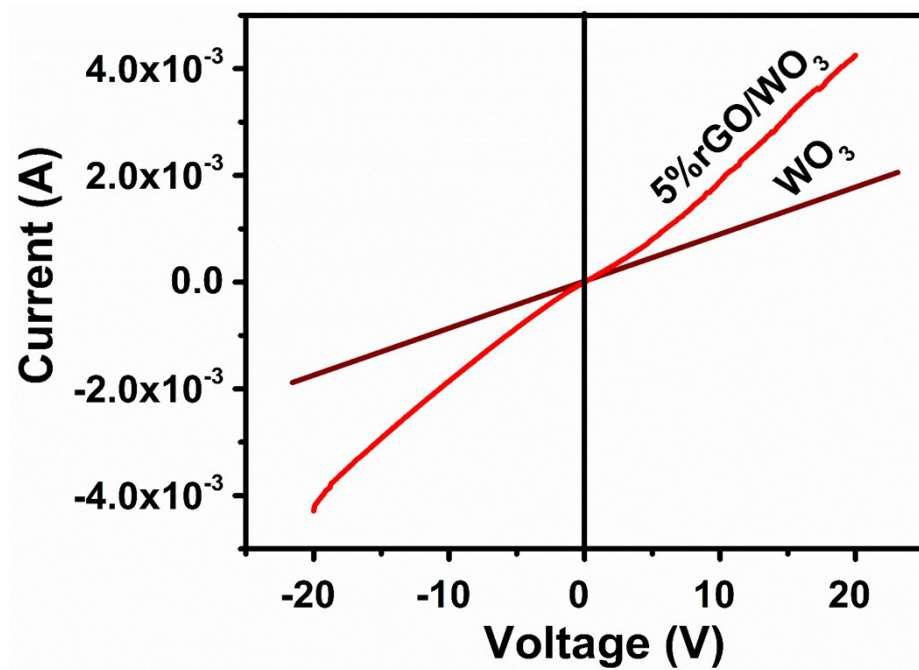

Fig. S5: I-V characteristics of  $\text{WO}_3$  nanospheres and 5% rGO/ $\text{WO}_3$  nanocomposite



## Gas sensing

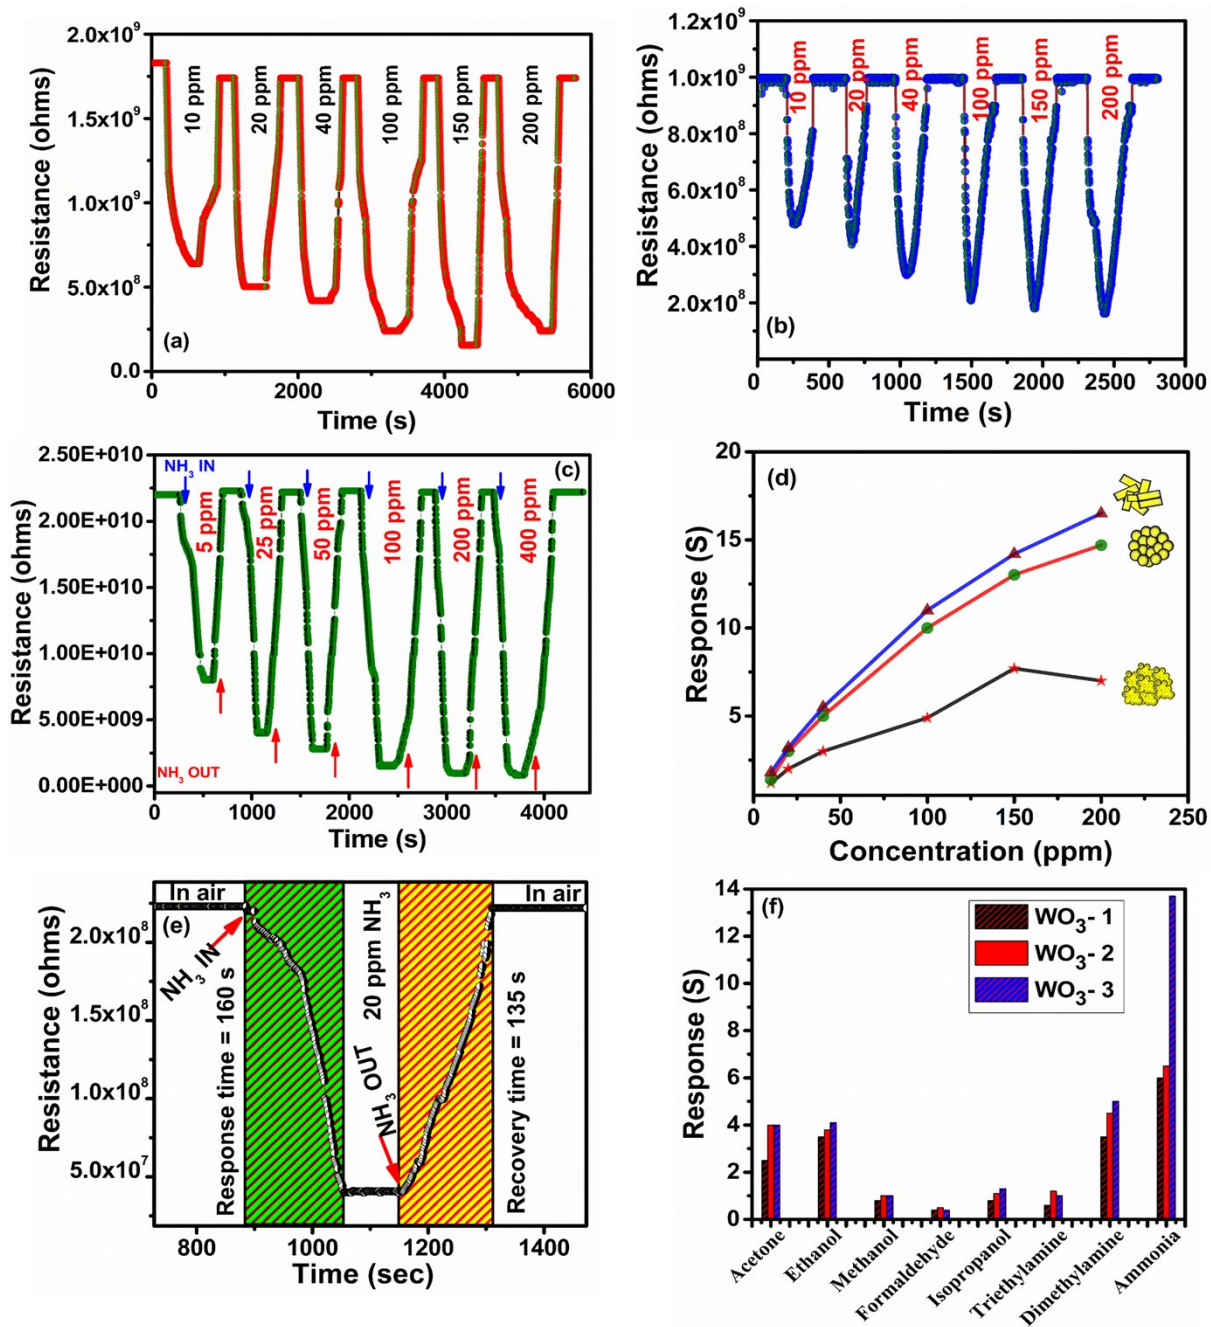

Fig. S6: Dynamic response, sensitivity and selectivity graph of  $WO_3$  nanostructures (a)  $WO_3$ -1 aggregated nanoparticles (SDS as surfactant) (b)  $WO_3$ -2 nanospheres (HMTA as surfactant) (c)  $WO_3$ -3 nanorods (d) Sensor response towards different morphologies (e) Response and recovery time of  $WO_3$ -3 nanorods towards 20 ppm  $NH_3$  and (f) Selectivity of different morphologies  $WO_3$  nanostructures.



**ST3: Comparison on the responses of different nanomaterials with graphene and PANI towards NH<sub>3</sub> sensing**

| S.No | Materials                                                 | Concentration               | Temperature                                | Sensor response            | Res/Rec time           | Ref       |
|------|-----------------------------------------------------------|-----------------------------|--------------------------------------------|----------------------------|------------------------|-----------|
| 1    | Graphene-Polyaniline hybrid                               | 10-100 ppm                  | Room temperature (22.0 °C)                 | 344.2                      | 20/27                  | [17]      |
| 2    | rGO-SnO <sub>2</sub> films                                | 25 -2800 ppm                | Room temperature                           | 1.3-22.0                   | 210/150                | [18]      |
| 3    | SnO <sub>2</sub> -WO <sub>3</sub> bilayer thin film       | 50-1000 ppm NH <sub>3</sub> | 300 °C                                     | 7.1                        | 1.9-20.3               | [19]      |
| 4    | PANI/WO <sub>3</sub>                                      | 10 ppm                      | Room temperature                           | 20.1                       | 13/ 49 s               | [20]      |
| 5    | Tin oxide-polyaniline nanocomposite                       | 100-500 ppm                 | Room temperature                           | 9-15%                      | 15/80 s (300 ppm)      | [21]      |
| 6    | rGO/WS <sub>2</sub> heterojunctions                       | 10 – 50 ppm                 | Room temperature                           | 121-256%                   | ~60/300 s (10 ppm)     | [22]      |
| 7    | Graphene-Based Wearable Gas Sensors                       | ppt - ppm                   | Room temperature and temperature dependent | ---                        | -----                  | [23]      |
| 8    | rGO                                                       | 300 ppm                     | Room Temperature                           | 3.1%                       | ~45/85 s               | [24]      |
| 9    | WO <sub>3</sub> nanostructures (aggregated nanoparticles, | <b>10-200 ppm</b>           | <b>Room</b>                                | 1.2-7, 1.4-14.7 & 1.8-16.0 | ~160/135 s for nanorod | This work |

|            |                                         |                   |                         |                  |                         |                  |
|------------|-----------------------------------------|-------------------|-------------------------|------------------|-------------------------|------------------|
|            | nanospheres and nanorods)               |                   | temperature             |                  |                         |                  |
| <b>10.</b> | <b>WO<sub>3</sub>/rGO nanocomposite</b> | <b>10-100 ppm</b> | <b>Room temperature</b> | <b>4.50-15.8</b> | <b>18-24 s (40 ppm)</b> | <b>This work</b> |

## References

- [1] V. Srivastava and K. Jain, highly sensitive NH<sub>3</sub> sensor using Pt catalyzed silica coating over WO<sub>3</sub> thick films, *Sensors and Actuators B*, 133 (2008) 46–52.
- [2] T.D. Senguttuvana, V. Srivastava, J. S. Tawal, M. Mishraa, S. Srivastava, K. Jain, Gas sensing properties of nanocrystalline tungsten oxide synthesized by acid precipitation method, *Sensors and Actuators B*, 150 (2010) 384–388.
- [3] Y. Wang, J. Liu, X. Cui, Y. Gao, J. Ma, Y. Sun, P. Sun, F. Liu, X. Liang, T. Zhang, G. Lu, NH<sub>3</sub> gas sensing performance enhanced by Pt-loaded on mesoporous WO<sub>3</sub>, *Sensors and Actuators B*, 238 (2017) 473–481.
- [4] I. Jimenez, M. A. Centeno, R. Scotti, F. Morazzoni, J. Arbiol, A. Corneta and J. R. Morantea, *J. Mater. Chem.*, 14 (2004) 2412 – 2420.
- [5] N.V. Hieu, V. V. Quang, N. D. Hoa, D. Kim, Preparing large-scale WO<sub>3</sub> nanowire-like structure for high sensitivity NH<sub>3</sub> gas sensor through a simple route, *Current Applied Physics.*, 11 (2011) 657-661.
- [6] M. D'Arienzo, L. Armelao, C. M. Mari, S. Polizzi, R. Ruffo, R. Scotti, and F. Morazzoni., Macroporous WO<sub>3</sub> Thin Films Active in NH<sub>3</sub> Sensing: Role of the Hosted Cr Isolated Centers and Pt Nanoclusters, *J. Am. Chem. Soc.*, 133 (2011) 5296 -5304.
- [7] L. Wang, J. Pfeifer, C. Balázsi, and P. I. Gouma, Synthesis and Sensing Properties to NH<sub>3</sub> of Hexagonal WO<sub>3</sub> Metastable Nanopowders, *Materials and Manufacturing Processes.*, 22 (2007) 773-776.
- [8] Y.M. Zhao, Y.Q. Zhu, Room temperature ammonia sensing properties of W<sub>18</sub>O<sub>49</sub> nanowires, *Sensors and Actuators B.*, 137 (2009) 27-31.

- [9] T. A. Ho, T.S. Jun, Y. S. Kim, Material and NH<sub>3</sub>-sensing properties of polypyrrole-coated tungsten oxide nanofibers, *Sensors and Actuators B*, 185 (2013) 523–529.
- [10] G. Wang, Y. Ji, X. Huang, X. Yang, P. I. Gouma, and M. Dudley, Fabrication and Characterization of Polycrystalline WO<sub>3</sub> Nanofibers and Their Application for Ammonia Sensing, *J. Phys. Chem. B*, 110 (2006) 23777-23782.
- [11] M. Epifani, N. G. Castelleo, J. D. Prades, A. Cirera, T. Andreu, J. Arbiol, P. Siciliano, J. R. Morante, Suppression of the NO<sub>2</sub> interference by chromium addition in WO<sub>3</sub>-based ammonia sensors. Investigation of the structural properties and of the related sensing pathways, *Sensors and Actuators B*, 187 (2013) 308–312.
- [12] D. D. Nguyen, D. V. Dang and D. C. Nguyen, Hydrothermal synthesis and NH<sub>3</sub> gas sensing property of WO<sub>3</sub> nanorods at low temperature, *Adv. Nat. Sci.: Nanosci. Nanotechnol.*, 6 (2015) 035006.13
- [13] S. Poongodi, P. S. Kumar, Y. Masuda, D. Mangalaraj, N. Ponpandian, C. Viswanathan and S. Ramakrishna, Synthesis of hierarchical WO<sub>3</sub> nanostructured thin films with enhanced electrochromic performance for switchable smart windows, *RSC Adv.*, 5 (2015) 96416-96427.
- [14] N. Asim, S. Radiman & M. A. B. Yarmo, Synthesis of WO<sub>3</sub> in nanoscale with the usage of sucrose ester microemulsion and CTAB micelle solution, *Materials Letters*, 6 (2007) 2652-2657.
- [15] Y. X. Wang, J. Sun, X. Y. Fan and X. Yu, A CTAB-assisted hydrothermal and solvothermal synthesis of ZnO nanopowders, *Ceramics International*, 37 (2011) 3431–3436.
- [16] G. Bailly, J. Rossignol, B. de Fonseca, P. Pribetich, and D. Stuergea, Microwave Gas Sensing with Hematite: Shape Effect on Ammonia Detection Using Pseudocubic, Rhombohedral, and Spindlelike Particles, *ACS Sens.*, 1 (2016) 656–662.
- [17] S. Bai, Y. Zhao, J. Sun, Y. Tian, R. Luo, D. Li and A. Chen, *Chem. Commun.*, 2015, 51, 7524 DOI: 10.1039/C5CC01241D
- [18] R. Ghosh, A. K. Nayak, S. Santra, D. Pradhan and P. K. Guha, Enhanced Ammonia Sensing at Room Temperature with Reduced Graphene Oxide/ Tin Oxide Hybrid Film, *RSC Adv.*, 5(62) (2015), 50165-50173, DOI: 10.1039/C5RA06696D.

- [19] N. V. Toan, C. M. Hung, N. V. Duy, N. D. Hoa, D. T.T. Le, N. V. Hieu, Bilayer SnO<sub>2</sub>–WO<sub>3</sub> nanofilms for enhanced NH<sub>3</sub> gas sensing performance, *Materials Science & Engineering B*, 224 (2017) 163–170
- [20] S. Li, P. Lin, L. Zhao, C. Wang, D. Liu, F. Liu\*, P. Sun, X. Liang, F. Liu, X. Yan, Y. Gao, G. Lu, The room temperature gas sensor based on Polyaniline@flower-likeWO<sub>3</sub> nanocomposites and flexible PET substrate for NH<sub>3</sub> detection, *Sensors and Actuators B*, 259 (2018) 505–513
- [21] N.G. Deshpandea, Y.G. Gudage, Ramphal Sharma, J.C. Vyas, J.B. Kim, Y.P. Lee, Studies on tin oxide-intercalated polyaniline nanocomposite for ammonia gas sensing applications, *Sensors and Actuators B*, 138 (2009) 76–84
- [22] X. Wang, D. Gu, X Li, S. Lin, S. Zhao, M. N. Rumyantseva, A. M. Gaskov, Reduced graphene oxide hybridized with WS<sub>2</sub> nanoflakes based heterojunctions for selective ammonia sensors at room temperature, *Sensors and Actuators B: Chemical*, 282 (2019) 290-299.
- [23] Eric Singh, M. Meyyappan, and Hari Singh Nalwa, Flexible Graphene-Based Wearable Gas and Chemical Sensors, *ACS Appl. Mater. Interfaces*, 9(2017) 34544–34586.
- [24] Cherukutty Ramakrishnan Minitha, Velunair Sukumaran Anithaa, Vijayakumar Subramaniam and Ramasamy Thangavelu Rajendra Kumar, Impact of Oxygen Functional Groups on Reduced Graphene Oxide Based Sensors for Ammonia and Toluene Detection at Room Temperature, *ACS Omega*, 3 (2018) 4105–4112
